# Supplementary material
Source: publisher site journal article supplement (https://www.e-cmh.org/upload/media/cmh-2022-0316-Supplementary-Fig-37.pdf)
Supplement: Supplementary file 1 [file cmh-2022-0316-Supplementary-Fig-37.pdf]

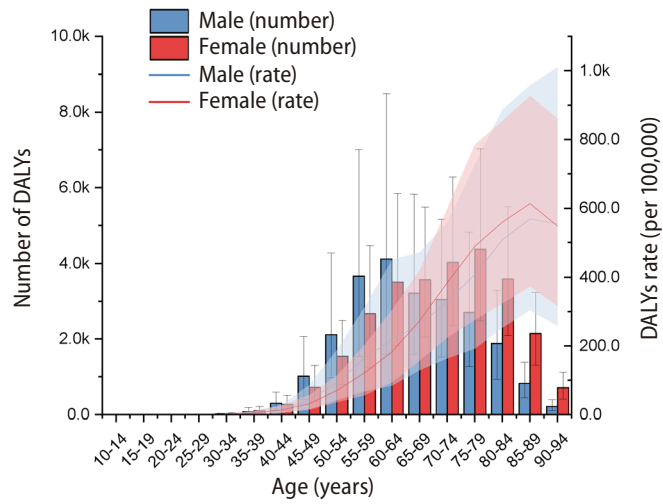

**Supplementary Figure 37.** Number and DALY rate of liver cancer due to HCV in the Republic of Korea in 2019. DALY, disease-adjusted life year; HCV, hepatitis C virus.
